# Supplementary material
Source: PubMed Central journal article supplement (PMC5325319)
Supplement: jf6b04322_si_001.pdf [file jf6b04322_si_001.pdf]

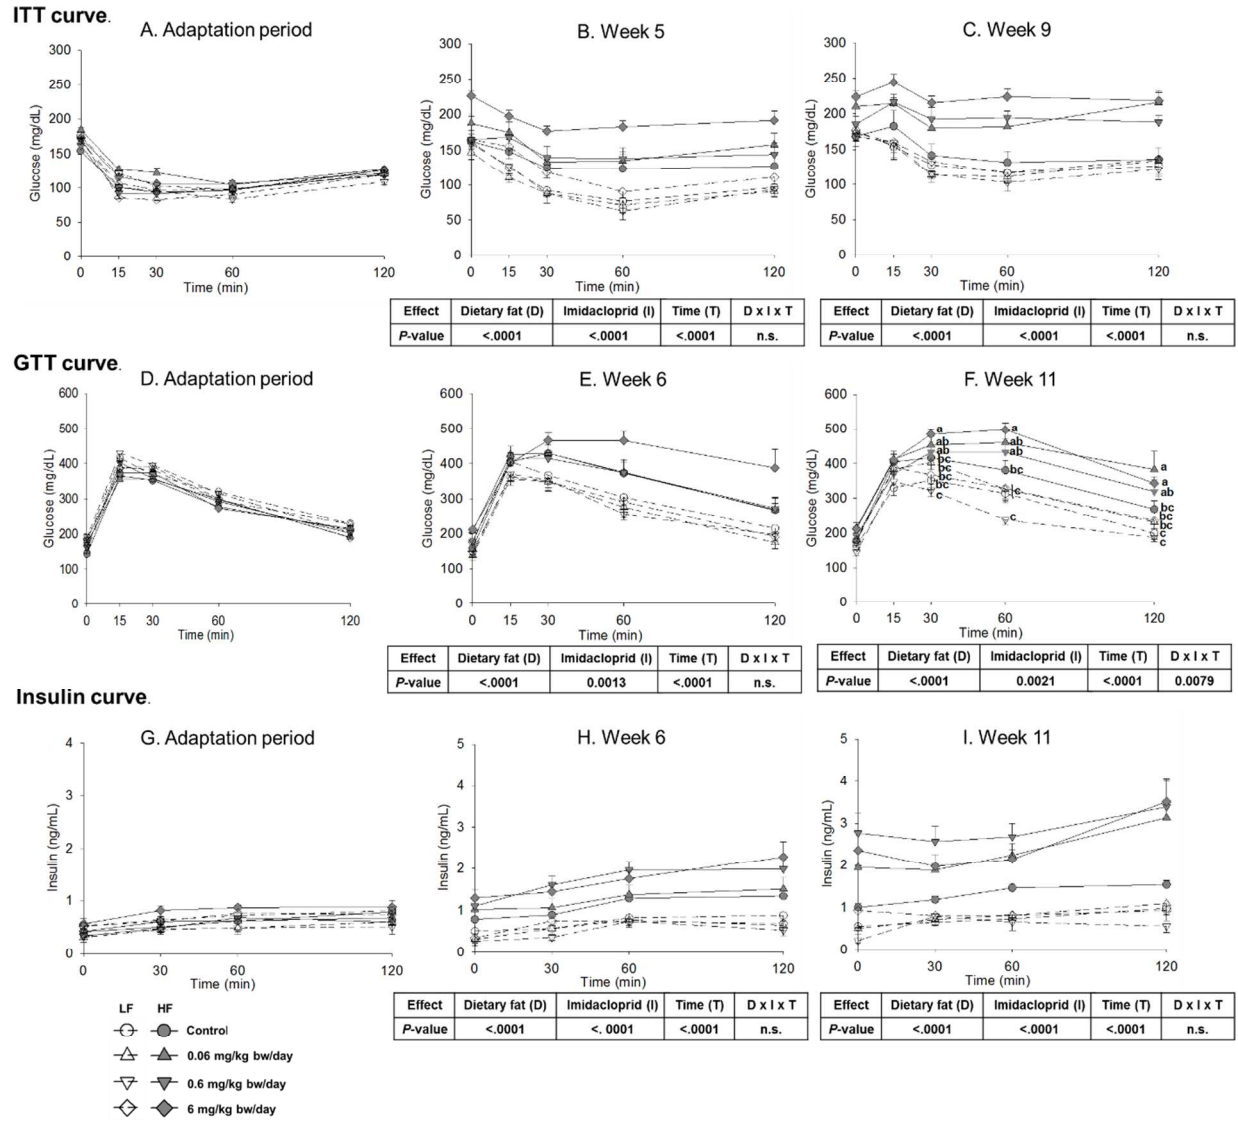

**Figure 1S.** Effects of imidacloprid on insulin tolerance test (ITT) (A, B, C), glucose tolerance test (GTT) (D, E, F) and insulin level determination (G, H, I). Mice were fed with low fat diet or high fat diet supplemented with (0, 0.06, 0.6 and 6 mg/kg bw/day) imidacloprid for 12 weeks. ITT was measured during adaptation period, week 5 and 9. GTT was measured during adaptation period, week 6 and 11. Blood was collected from the tail vein, and glucose levels were determined at 0 min, then the insulin (ITT) or glucose solution (GTT) was administered by intraperitoneal injection and glucose level were further measured at 15, 30, 60 and 120 min. During GTT, the blood was collected from the tail vein at 0, 30, 60 and 120 min for determination of insulin level. LF, low fat diet; HF, high fat diet. Numbers represent means  $\pm$  SE (n=5-8). Means with different letters were significantly different at  $P < 0.05$ .
